# Supplementary material for: A modular approach to integrating multiple data sources into real-time clinical prediction for pediatric diarrhea
Source: eLife. 2021 Feb 2;10:e63009. doi: 10.7554/eLife.63009 (PMC7853717; doi:10.7554/eLife.63009)
Supplement: Figure 4—source data 1. [file elife-63009-fig4-data1.csv]

	Formula	AUC	Low	High
1	Pre-test * PresPtnt	0.839414865159411	0.80834229590048	0.870487434418343
2	PresPtnt * Seasonal	0.829740226286484	0.798084880339712	0.861395572233256
3	PresPtnt * Climate	0.821913329502447	0.790097814224224	0.85372884478067
4	Pre-test * PresPtnt * Climate	0.81996155903858	0.78715188298941	0.852771235087749
5	PresPtnt * Joint	0.817841361681891	0.785056908893648	0.850625814470134
6	Pre-test * PresPtnt * Seasonal	0.815542829968098	0.781999482816825	0.849086177119371
7	PresPtnt	0.808751263201696	0.775834868050799	0.841667658352593
8	PresPtnt * Climate * Seasonal	0.808300473576793	0.775025679284974	0.841575267868611
9	Pre-test * PresPtnt * Joint	0.806150553827253	0.771644737349638	0.840656370304869
10	Pre-test * PresPtnt * Climate * Seasonal	0.794965026651079	0.760037243887036	0.829892809415122
